# Supplementary material for: Involvement of RpoN in Regulating Motility, Biofilm, Resistance, and Spoilage Potential of Pseudomonas fluorescens
Source: Front Microbiol. 2021 May 31;12:641844. doi: 10.3389/fmicb.2021.641844 (PMC8202526; doi:10.3389/fmicb.2021.641844)
Supplement: Supplementary file 6 [file Table_6.XLSX]

## Sheet: rpoNvsUK4.DEG_up
Supplementary Table S6 The detailed data of upregulated genes in the rpoN mutant.
Locus tag	readcount_rpoN	readcount_UK4	log2FoldChange	pval	padj	Function description	KEGG url
HZ99_RS00055	87.1805	38.8699	1.1654	0.00019022	0.00045008	RNA polymerase sigma factor	http://www.genome.jp/dbget-bin/www_bget?pfn:HZ99_00055
HZ99_RS00140	353.313	71.3676	2.3076	1.2963e-12	9.1072e-12	RNA polymerase sigma factor	http://www.genome.jp/dbget-bin/www_bget?pfn:HZ99_00145
HZ99_RS00350	750.369	347.129	1.1121	4.046e-13	2.952e-12	potassium transporter KefB	http://www.genome.jp/dbget-bin/www_bget?pfn:HZ99_00360
HZ99_RS00500	16.3831	2.56272	2.6765	5.6288e-05	0.00014384	cation:proton antiporter	http://www.genome.jp/dbget-bin/www_bget?pfn:HZ99_00515
HZ99_RS00515	23.0282	11.4771	1.0047	0.017565	0.029394	monovalent cation/H+ antiporter subunit C	http://www.genome.jp/dbget-bin/www_bget?pfn:HZ99_00530
HZ99_RS00520	1581.75	704.429	1.167	1.5286e-16	1.4838e-15	monovalent cation/H+ antiporter subunit A	http://www.genome.jp/dbget-bin/www_bget?pfn:HZ99_00535
HZ99_RS00650	175.5	81.5691	1.1054	1.464e-05	4.1037e-05	transcriptional regulator	http://www.genome.jp/dbget-bin/www_bget?pfn:HZ99_00675
HZ99_RS00765	88.6486	35.2333	1.3312	6.9401e-07	2.3668e-06	RNA polymerase sigma factor	http://www.genome.jp/dbget-bin/www_bget?pfn:HZ99_00790
HZ99_RS00855	285.287	100.262	1.5086	8.9508e-16	8.1552e-15	N-ethylmaleimide reductase	http://www.genome.jp/dbget-bin/www_bget?pfn:HZ99_00880
HZ99_RS01205	177.462	81.8419	1.1166	9.2645e-05	0.00022917	--	--
HZ99_RS01245	57.1347	24.0085	1.2508	3.4435e-05	9.091e-05	hypothetical protein	http://www.genome.jp/dbget-bin/www_bget?pfn:HZ99_01275
HZ99_RS01480	478.43	218.578	1.1302	1.1613e-12	8.2009e-12	hypothetical protein	http://www.genome.jp/dbget-bin/www_bget?pfn:HZ99_01535
HZ99_RS01590	406.406	172.684	1.2348	3.5635e-13	2.6139e-12	alcohol dehydrogenase	http://www.genome.jp/dbget-bin/www_bget?pfn:HZ99_01650
HZ99_RS01670	53.1665	24.1813	1.1366	0.00046718	0.001035	hypothetical protein	http://www.genome.jp/dbget-bin/www_bget?pfn:HZ99_05435
HZ99_RS01955	1528.93	594.011	1.364	3.5844e-22	5.0754e-21	dienelactone hydrolase	http://www.genome.jp/dbget-bin/www_bget?pfn:HZ99_02030
HZ99_RS01995	162.977	64.8453	1.3296	2.585e-07	9.4743e-07	RNA polymerase sigma factor	http://www.genome.jp/dbget-bin/www_bget?pfn:HZ99_02070
HZ99_RS02240	6443.48	1528.08	2.0761	1.6172e-09	7.9683e-09	alkyl hydroperoxide reductase	http://www.genome.jp/dbget-bin/www_bget?pfn:HZ99_02325
HZ99_RS02245	2568.47	229.714	3.483	4.1957e-15	3.6074e-14	alkyl hydroperoxide reductase	http://www.genome.jp/dbget-bin/www_bget?pfn:HZ99_02330
HZ99_RS02260	16127.8	6416.5	1.3297	1.1611e-23	1.802e-22	transcriptional regulator	http://www.genome.jp/dbget-bin/www_bget?pfn:HZ99_02345
HZ99_RS02370	507.114	249.842	1.0213	1.1642e-10	6.5267e-10	racemase	http://www.genome.jp/dbget-bin/www_bget?pfn:HZ99_02460
HZ99_RS02685	171.244	47.252	1.8576	2.276e-15	1.988e-14	iron transporter	http://www.genome.jp/dbget-bin/www_bget?pfn:HZ99_02775
HZ99_RS02695	236.41	90.5598	1.3843	1.6205e-05	4.5079e-05	multidrug DMT transporter permease	http://www.genome.jp/dbget-bin/www_bget?pfn:HZ99_02785
HZ99_RS02700	321.211	67.3834	2.2531	1.3255e-12	9.3003e-12	iron transporter	http://www.genome.jp/dbget-bin/www_bget?pfn:HZ99_02790
HZ99_RS02730	1157.44	428.477	1.4336	6.0617e-23	8.9765e-22	amino acid transporter LysE	http://www.genome.jp/dbget-bin/www_bget?pfn:HZ99_02820
HZ99_RS02740	51.3267	19.4196	1.4022	6.1479e-05	0.00015594	ribonuclease III	http://www.genome.jp/dbget-bin/www_bget?pfn:HZ99_02830
HZ99_RS02745	14.7566	1.69089	3.1255	4.9508e-05	0.00012722	hypothetical protein	http://www.genome.jp/dbget-bin/www_bget?pfn:HZ99_02835
HZ99_RS02845	760.627	376.865	1.0131	4.8447e-11	2.8255e-10	peroxidase	http://www.genome.jp/dbget-bin/www_bget?pfn:HZ99_02935
HZ99_RS02985	412.601	182.476	1.177	1.6126e-05	4.4883e-05	polyketide cyclase	http://www.genome.jp/dbget-bin/www_bget?pfn:HZ99_03075
HZ99_RS03065	281.705	117.796	1.2579	9.7702e-12	6.2198e-11	AsnC family transcriptional regulator	http://www.genome.jp/dbget-bin/www_bget?pfn:HZ99_03155
HZ99_RS03105	27.9167	12.4353	1.1667	0.0055146	0.010267	DNA-binding protein	http://www.genome.jp/dbget-bin/www_bget?pfn:HZ99_03205
HZ99_RS03200	621.867	245.111	1.3432	1.6192e-17	1.6945e-16	acyl-CoA dehydrogenase	http://www.genome.jp/dbget-bin/www_bget?pfn:HZ99_03300
HZ99_RS03205	1009.96	391.019	1.369	7.9048e-20	9.6295e-19	IclR family transcriptional regulator	http://www.genome.jp/dbget-bin/www_bget?pfn:HZ99_03305
HZ99_RS03275	1625.77	280.398	2.5356	1.9876e-65	1.4181e-63	hypothetical protein	http://www.genome.jp/dbget-bin/www_bget?pfn:HZ99_03380
HZ99_RS03290	858.736	425.028	1.0147	3.6004e-12	2.4064e-11	gabD; succinate-semialdehyde dehydrogenase	http://www.genome.jp/dbget-bin/www_bget?pfn:HZ99_03395
HZ99_RS03380	695.484	136.199	2.3523	8.2481e-45	2.8863e-43	4-hydroxy-2-oxovalerate aldolase	http://www.genome.jp/dbget-bin/www_bget?pfn:HZ99_03500
HZ99_RS03385	862.88	416.044	1.0524	5.6009e-13	4.0436e-12	TonB-dependent receptor	http://www.genome.jp/dbget-bin/www_bget?pfn:HZ99_03505
HZ99_RS03615	720.961	329.682	1.1288	1.6757e-13	1.2664e-12	--	--
HZ99_RS03735	2564.83	962.182	1.4145	3.0858e-23	4.6448e-22	tpx; peroxidase	http://www.genome.jp/dbget-bin/www_bget?pfn:HZ99_03865
HZ99_RS04430	285.456	118.678	1.2662	1.3423e-11	8.4184e-11	N-hydroxyarylamine O-acetyltransferase	http://www.genome.jp/dbget-bin/www_bget?pfn:HZ99_04575
HZ99_RS04450	1555.81	636.589	1.2892	1.0948e-19	1.319e-18	aldehyde dehydrogenase	http://www.genome.jp/dbget-bin/www_bget?pfn:HZ99_04595
HZ99_RS04540	267.7	128.504	1.0588	4.399e-09	2.046e-08	NADH:flavin oxidoreductase	http://www.genome.jp/dbget-bin/www_bget?pfn:HZ99_04685
HZ99_RS04690	604.994	270.368	1.162	4.9204e-06	1.4821e-05	MarR family transcriptional regulator	http://www.genome.jp/dbget-bin/www_bget?pfn:HZ99_04835
HZ99_RS04760	917.019	429.108	1.0956	3.7965e-14	3.0406e-13	nicotinamidase	http://www.genome.jp/dbget-bin/www_bget?pfn:HZ99_04905
HZ99_RS04985	618.154	189.83	1.7033	9.4522e-26	1.6752e-24	Cro/Cl family transcriptional regulator	http://www.genome.jp/dbget-bin/www_bget?pfn:HZ99_05140
HZ99_RS05070	316.439	136.531	1.2127	1.884e-11	1.1565e-10	IclR family transcriptional regulator	http://www.genome.jp/dbget-bin/www_bget?pfn:HZ99_05225
HZ99_RS05075	1071.85	378.686	1.501	4.5831e-24	7.3841e-23	endoribonuclease L-PSP	http://www.genome.jp/dbget-bin/www_bget?pfn:HZ99_05230
HZ99_RS05145	5114.91	1762.48	1.5371	1.0633e-29	2.1962e-28	SCP-2 family sterol carrier protein	http://www.genome.jp/dbget-bin/www_bget?pfn:HZ99_05300
HZ99_RS05270	132.713	44.718	1.5694	3.8839e-11	2.2994e-10	LysR family transcriptional regulator	http://www.genome.jp/dbget-bin/www_bget?pfn:HZ99_05430
HZ99_RS05275	541.278	33.7349	4.0041	7.3424e-26	1.3055e-24	hypothetical protein	http://www.genome.jp/dbget-bin/www_bget?pfn:HZ99_05435
HZ99_RS05305	1370.78	506.774	1.4356	6.2701e-23	9.2602e-22	hydrolase	http://www.genome.jp/dbget-bin/www_bget?pfn:HZ99_05470
HZ99_RS05390	3044.89	1440.15	1.0802	1.8159e-16	1.7472e-15	polyurethanase	http://www.genome.jp/dbget-bin/www_bget?pfn:HZ99_05565
HZ99_RS05615	1882.38	870.231	1.1131	1.4479e-15	1.2976e-14	NADH dehydrogenase	http://www.genome.jp/dbget-bin/www_bget?pfn:HZ99_05800
HZ99_RS05620	3267.41	1260.15	1.3745	8.5189e-24	1.3334e-22	NADH dehydrogenase	http://www.genome.jp/dbget-bin/www_bget?pfn:HZ99_05805
HZ99_RS05625	769.599	240.471	1.6782	2.4942e-25	4.2823e-24	NADH:ubiquinone oxidoreductase	http://www.genome.jp/dbget-bin/www_bget?pfn:HZ99_05810
HZ99_RS05630	475.703	152.367	1.6425	8.4188e-23	1.2334e-21	NADH dehydrogenase	http://www.genome.jp/dbget-bin/www_bget?pfn:HZ99_05815
HZ99_RS05635	298.446	106.981	1.4801	1.1031e-15	9.9846e-15	NADH dehydrogenase	http://www.genome.jp/dbget-bin/www_bget?pfn:HZ99_05820
HZ99_RS05640	30.2608	7.81792	1.9526	2.6155e-05	7.0266e-05	NADH-quinone oxidoreductase subunit K	http://www.genome.jp/dbget-bin/www_bget?pfn:HZ99_05825
HZ99_RS05645	1659.12	581.592	1.5123	3.3967e-22	4.8346e-21	NADH-quinone oxidoreductase subunit L	http://www.genome.jp/dbget-bin/www_bget?pfn:HZ99_05830
HZ99_RS05650	1015.56	392.307	1.3722	4.2738e-20	5.3003e-19	NADH:ubiquinone oxidoreductase subunit M	http://www.genome.jp/dbget-bin/www_bget?pfn:HZ99_05835
HZ99_RS05655	1554.04	505.775	1.6195	3.1611e-29	6.4086e-28	NADH:ubiquinone oxidoreductase subunit N	http://www.genome.jp/dbget-bin/www_bget?pfn:HZ99_05840
HZ99_RS05720	3230.78	1541.02	1.068	8.136e-14	6.2779e-13	peptidylprolyl isomerase	http://www.genome.jp/dbget-bin/www_bget?pfn:HZ99_05905
HZ99_RS05760	1172.34	445.231	1.3968	9.75e-22	1.3561e-20	exonuclease III	http://www.genome.jp/dbget-bin/www_bget?pfn:HZ99_05945
HZ99_RS05775	599.438	262.298	1.1924	5.3004e-14	4.19e-13	LysR family transcriptional regulator	http://www.genome.jp/dbget-bin/www_bget?pfn:HZ99_05960
HZ99_RS05850	1801.87	863.207	1.0617	3.2747e-14	2.638e-13	transcriptional regulator	http://www.genome.jp/dbget-bin/www_bget?pfn:HZ99_06035
HZ99_RS05865	277.902	138.674	1.0029	2.4022e-08	1.0137e-07	LysR family transcriptional regulator	http://www.genome.jp/dbget-bin/www_bget?pfn:HZ99_06050
HZ99_RS05890	3245.77	852.952	1.928	4.8453e-30	1.0358e-28	fadH; 2,4-dienoyl-CoA reductase	http://www.genome.jp/dbget-bin/www_bget?pfn:HZ99_06075
HZ99_RS05930	4840.5	2333.68	1.0525	1.4067e-11	8.7892e-11	peptidylprolyl isomerase	http://www.genome.jp/dbget-bin/www_bget?pfn:HZ99_06120
HZ99_RS05935	35510.1	13777.6	1.3659	1.7444e-25	3.0424e-24	transcriptional regulator HU subunit alpha	http://www.genome.jp/dbget-bin/www_bget?pfn:HZ99_06125
HZ99_RS06050	398.702	189.217	1.0753	7.9259e-11	4.5078e-10	hypothetical protein	http://www.genome.jp/dbget-bin/www_bget?pfn:HZ99_06245
HZ99_RS06110	516.281	112.941	2.1926	2.5652e-36	6.8415e-35	ArsR family transcriptional regulator	http://www.genome.jp/dbget-bin/www_bget?pfn:HZ99_06305
HZ99_RS06255	451.983	220.212	1.0374	1.5896e-10	8.7419e-10	LysR family transcriptional regulator	http://www.genome.jp/dbget-bin/www_bget?pfn:HZ99_06450
HZ99_RS06280	5897.49	1853.78	1.6696	1.3539e-06	4.4435e-06	hypothetical protein	http://www.genome.jp/dbget-bin/www_bget?pfn:HZ99_06475
HZ99_RS06475	315.118	136.063	1.2116	1.2187e-08	5.3955e-08	--	--
HZ99_RS06490	208.86	81.0119	1.3663	3.307e-11	1.9727e-10	hypothetical protein	http://www.genome.jp/dbget-bin/www_bget?pfn:HZ99_06685
HZ99_RS06875	772.25	380.302	1.0219	6.56e-12	4.2651e-11	hypothetical protein	http://www.genome.jp/dbget-bin/www_bget?pfn:HZ99_07075
HZ99_RS06960	272.759	75.2104	1.8586	6.9883e-21	9.0766e-20	organic hydroperoxide resistance protein	http://www.genome.jp/dbget-bin/www_bget?pfn:HZ99_07165
HZ99_RS07120	20743.4	7855.32	1.4009	3.1911e-14	2.5782e-13	DNA-binding protein	http://www.genome.jp/dbget-bin/www_bget?pfn:HZ99_07325
HZ99_RS07245	210.747	62.9055	1.7443	3.3758e-17	3.4731e-16	RNA polymerase sigma 70	http://www.genome.jp/dbget-bin/www_bget?pfn:HZ99_07455
HZ99_RS07250	137.057	37.6691	1.8633	2.0403e-08	8.7301e-08	hypothetical protein	http://www.genome.jp/dbget-bin/www_bget?pfn:HZ99_07460
HZ99_RS07260	487.599	191.461	1.3486	4.3305e-16	4.0393e-15	glutathione S-transferase	http://www.genome.jp/dbget-bin/www_bget?pfn:HZ99_07470
HZ99_RS07270	2997.08	888.866	1.7535	4.7845e-36	1.2458e-34	gamma-glutamylputrescine oxidoreductase	http://www.genome.jp/dbget-bin/www_bget?pfn:HZ99_07480
HZ99_RS07350	1094.51	428.085	1.3543	2.3771e-20	3.0022e-19	3-isopropylmalate dehydrogenase LeuB	http://www.genome.jp/dbget-bin/www_bget?pfn:HZ99_07560
HZ99_RS07355	587.889	116.876	2.3306	4.71e-08	1.9311e-07	SAM-dependent methyltransferase	http://www.genome.jp/dbget-bin/www_bget?pfn:HZ99_07565
HZ99_RS07360	2018.34	186.891	3.4329	5.1254e-24	8.2096e-23	3-isopropylmalate dehydratase LeuD	http://www.genome.jp/dbget-bin/www_bget?pfn:HZ99_07570
HZ99_RS07365	9136.08	647.443	3.8187	1.3565e-146	4.6578e-144	isopropylmalate isomerase LeuC	http://www.genome.jp/dbget-bin/www_bget?pfn:HZ99_07575
HZ99_RS07395	31234.2	10435.9	1.5816	1.1828e-09	5.9075e-09	heat-shock protein	http://www.genome.jp/dbget-bin/www_bget?pfn:HZ99_07605
HZ99_RS07650	513.926	130.369	1.979	1.945e-13	1.4578e-12	hypothetical protein	http://www.genome.jp/dbget-bin/www_bget?pfn:HZ99_07875
HZ99_RS07710	858.201	186.198	2.2045	3.9702e-19	4.6707e-18	acetylornithine aminotransferase	http://www.genome.jp/dbget-bin/www_bget?pfn:HZ99_07935
HZ99_RS07725	3689.79	1725.02	1.0969	8.4441e-11	4.7826e-10	trans-2-enoyl-CoA reductase	http://www.genome.jp/dbget-bin/www_bget?pfn:HZ99_07950
HZ99_RS07785	820.541	282.121	1.5403	5.6637e-24	8.9968e-23	pilus assembly protein	http://www.genome.jp/dbget-bin/www_bget?pfn:HZ99_08010
HZ99_RS07860	1294.01	495.582	1.3847	1.5848e-21	2.1605e-20	citrate-proton symporter	http://www.genome.jp/dbget-bin/www_bget?pfn:HZ99_08085
HZ99_RS07925	7426.82	3311.71	1.1652	1.0702e-18	1.225e-17	fadA; 3-ketoacyl-CoA thiolase	http://www.genome.jp/dbget-bin/www_bget?pfn:HZ99_08150
HZ99_RS08135	600.385	195.75	1.6169	4.3048e-17	4.396e-16	acyl-CoA dehydrogenase	http://www.genome.jp/dbget-bin/www_bget?pfn:HZ99_08365
HZ99_RS08475	1042.79	521.325	1.0002	6.854e-12	4.4458e-11	HAD family hydrolase	http://www.genome.jp/dbget-bin/www_bget?pfn:HZ99_08720
HZ99_RS08680	4672.85	1316.69	1.8274	9.0129e-40	2.7358e-38	enoyl-CoA hydratase	http://www.genome.jp/dbget-bin/www_bget?pfn:HZ99_08935
HZ99_RS08695	1776.78	885.586	1.0046	8.5697e-13	6.0987e-12	amidotransferase	http://www.genome.jp/dbget-bin/www_bget?pfn:HZ99_08950
HZ99_RS08750	451.245	214.195	1.075	2.2723e-11	1.3798e-10	translation initiation factor 2	http://www.genome.jp/dbget-bin/www_bget?pfn:HZ99_09010
HZ99_RS08755	1502.95	626.274	1.2629	1.0892e-18	1.2441e-17	GntR family transcriptional regulator	http://www.genome.jp/dbget-bin/www_bget?pfn:HZ99_09015
HZ99_RS08870	13977.8	5903.63	1.2435	2.7937e-20	3.5122e-19	acyl carrier protein	http://www.genome.jp/dbget-bin/www_bget?pfn:HZ99_09130
HZ99_RS08940	268.277	97.7317	1.4568	7.627e-15	6.4504e-14	(2Fe-2S)-binding protein	http://www.genome.jp/dbget-bin/www_bget?pfn:HZ99_09200
HZ99_RS09015	182.624	87.2101	1.0663	1.435e-07	5.4713e-07	arsenate reductase	http://www.genome.jp/dbget-bin/www_bget?pfn:HZ99_09275
HZ99_RS09135	3428.43	1257.24	1.4473	1.6549e-25	2.9048e-24	helicase	http://www.genome.jp/dbget-bin/www_bget?pfn:HZ99_09405
HZ99_RS09155	210.677	103.032	1.0319	8.0348e-08	3.185e-07	resolvase	http://www.genome.jp/dbget-bin/www_bget?pfn:HZ99_09425
HZ99_RS09270	237.246	87.1535	1.4448	2.6426e-13	1.962e-12	hypothetical protein	http://www.genome.jp/dbget-bin/www_bget?pfn:HZ99_09540
HZ99_RS09380	71.5246	27.6605	1.3706	6.4168e-06	1.9035e-05	glycosyltransferase	http://www.genome.jp/dbget-bin/www_bget?pfn:HZ99_09650
HZ99_RS09420	202.445	95.0998	1.09	6.7826e-08	2.716e-07	hypothetical protein	http://www.genome.jp/dbget-bin/www_bget?pfn:HZ99_09690
HZ99_RS09585	3474.81	1064.25	1.7071	7.4701e-35	1.8826e-33	aspartate kinase	http://www.genome.jp/dbget-bin/www_bget?pfn:HZ99_09865
HZ99_RS09590	3225.5	1557.52	1.0503	1.8538e-14	1.5292e-13	alanyl-tRNA synthetase	http://www.genome.jp/dbget-bin/www_bget?pfn:HZ99_09870
HZ99_RS09595	3404.9	1416.89	1.2649	3.4309e-11	2.04e-10	threonine aldolase	http://www.genome.jp/dbget-bin/www_bget?pfn:HZ99_09875
HZ99_RS09600	1349.21	566.723	1.2514	8.7876e-15	7.3822e-14	6,7-dimethyl-8-ribityllumazine synthase	http://www.genome.jp/dbget-bin/www_bget?pfn:HZ99_09880
HZ99_RS09610	354.743	147.764	1.2635	4.9332e-13	3.5709e-12	topoisomerase II	http://www.genome.jp/dbget-bin/www_bget?pfn:HZ99_09890
HZ99_RS09650	480.984	239.332	1.007	8.3645e-10	4.2394e-09	amino acid transporter	http://www.genome.jp/dbget-bin/www_bget?pfn:HZ99_09930
HZ99_RS09670	6110.76	2534.36	1.2697	1.044e-20	1.3433e-19	ABC transporter substrate-binding protein	http://www.genome.jp/dbget-bin/www_bget?pfn:HZ99_09950
HZ99_RS09705	426.396	190.315	1.1638	1.4916e-12	1.0413e-11	ribonucleotide-diphosphate reductase subunit beta	http://www.genome.jp/dbget-bin/www_bget?pfn:HZ99_09985
HZ99_RS09750	2426.56	665.248	1.867	1.2926e-40	4.0121e-39	hypothetical protein	http://www.genome.jp/dbget-bin/www_bget?pfn:HZ99_10030
HZ99_RS09755	2018.97	851.731	1.2451	5.0738e-19	5.9059e-18	glycerophosphodiester phosphodiesterase	http://www.genome.jp/dbget-bin/www_bget?pfn:HZ99_10035
HZ99_RS09795	228.806	90.9139	1.3316	7.8081e-12	5.0291e-11	LysR family transcriptional regulator	http://www.genome.jp/dbget-bin/www_bget?pfn:HZ99_10075
HZ99_RS09815	316.416	156.05	1.0198	9.7678e-09	4.3772e-08	transcriptional regulator	http://www.genome.jp/dbget-bin/www_bget?pfn:HZ99_10095
HZ99_RS09855	2260.53	1046.05	1.1117	4.3486e-16	4.0493e-15	AraC family transcriptional regulator	http://www.genome.jp/dbget-bin/www_bget?pfn:HZ99_10135
HZ99_RS09925	6314.59	2775.56	1.1859	1.2963e-18	1.4654e-17	long-chain fatty acid--CoA ligase	http://www.genome.jp/dbget-bin/www_bget?pfn:HZ99_10210
HZ99_RS09960	1230.13	390.227	1.6564	2.9673e-21	3.9474e-20	keto-deoxy-phosphogluconate aldolase	http://www.genome.jp/dbget-bin/www_bget?pfn:HZ99_10245
HZ99_RS09965	738.072	261.453	1.4972	2.7526e-07	1.0022e-06	6-phosphogluconolactonase	http://www.genome.jp/dbget-bin/www_bget?pfn:HZ99_10250
HZ99_RS10005	1237.92	443.09	1.4822	5.5519e-24	8.8668e-23	sugar ABC transporter substrate-binding protein	http://www.genome.jp/dbget-bin/www_bget?pfn:HZ99_10290
HZ99_RS10010	972.684	268.324	1.858	2.2227e-34	5.5255e-33	sugar isomerase	http://www.genome.jp/dbget-bin/www_bget?pfn:HZ99_10295
HZ99_RS10040	17837.4	2962.38	2.5901	8.1176e-77	7.3112e-75	superoxide dismutase	http://www.genome.jp/dbget-bin/www_bget?pfn:HZ99_10325
HZ99_RS10055	2856.65	1067.46	1.4201	1.8246e-23	2.8001e-22	peptidase	http://www.genome.jp/dbget-bin/www_bget?pfn:HZ99_10340
HZ99_RS10225	14940.8	4488.81	1.7348	3.2794e-39	9.6347e-38	cold-shock protein	http://www.genome.jp/dbget-bin/www_bget?pfn:HZ99_10515
HZ99_RS10260	276.145	105.342	1.3903	1.8963e-13	1.4252e-12	hypothetical protein	http://www.genome.jp/dbget-bin/www_bget?pfn:HZ99_10550
HZ99_RS10360	1467.64	691.815	1.085	5.6849e-14	4.4746e-13	cold-shock protein	http://www.genome.jp/dbget-bin/www_bget?pfn:HZ99_10650
HZ99_RS10390	1494.72	579.791	1.3663	9.0526e-21	1.1702e-19	nucleotide-binding protein	http://www.genome.jp/dbget-bin/www_bget?pfn:HZ99_10680
HZ99_RS10460	545.985	227.907	1.2604	4.5083e-15	3.8581e-14	membrane protein	http://www.genome.jp/dbget-bin/www_bget?pfn:HZ99_10750
HZ99_RS10520	4217.32	1473.07	1.5175	8.9654e-21	1.1617e-19	fumarate hydratase	http://www.genome.jp/dbget-bin/www_bget?pfn:HZ99_10810
HZ99_RS10550	544.199	247.717	1.1354	3.1552e-10	1.6604e-09	hypothetical protein	http://www.genome.jp/dbget-bin/www_bget?pfn:HZ99_10840
HZ99_RS10570	412.415	176.794	1.222	1.2923e-13	9.8336e-13	chemotaxis protein CheY	http://www.genome.jp/dbget-bin/www_bget?pfn:HZ99_10860
HZ99_RS10575	787.454	336.286	1.2275	1.3776e-16	1.3419e-15	glucokinase	http://www.genome.jp/dbget-bin/www_bget?pfn:HZ99_10865
HZ99_RS10585	1655.47	827.111	1.0011	0.00048697	0.0010762	gapA; glyceraldehyde-3-phosphate dehydrogenase	http://www.genome.jp/dbget-bin/www_bget?pfn:HZ99_10875
HZ99_RS10590	259.94	56.169	2.2103	2.3006e-26	4.2415e-25	RNA polymerase subunit sigma-24	http://www.genome.jp/dbget-bin/www_bget?pfn:HZ99_10880
HZ99_RS10620	825.797	360.328	1.1965	2.3199e-15	2.0199e-14	nitroreductase	http://www.genome.jp/dbget-bin/www_bget?pfn:HZ99_10910
HZ99_RS10625	430.827	165.884	1.3769	2.4523e-16	2.3391e-15	thiol oxidoreductase	http://www.genome.jp/dbget-bin/www_bget?pfn:HZ99_10915
HZ99_RS10630	902.421	429.635	1.0707	1.8299e-12	1.2598e-11	imelysin	http://www.genome.jp/dbget-bin/www_bget?pfn:HZ99_10920
HZ99_RS10720	50631	23004.9	1.1381	2.1224e-17	2.2126e-16	groEL; molecular chaperone GroEL	http://www.genome.jp/dbget-bin/www_bget?pfn:HZ99_11010
HZ99_RS10735	971.448	275.308	1.8191	6.2177e-33	1.4475e-31	heme iron utilization protein	http://www.genome.jp/dbget-bin/www_bget?pfn:HZ99_11025
HZ99_RS10740	1321.12	584.865	1.1756	3.3351e-16	3.1429e-15	fabG; 3-ketoacyl-ACP reductase	http://www.genome.jp/dbget-bin/www_bget?pfn:HZ99_11030
HZ99_RS10865	5638.11	2596.15	1.1188	1.0992e-16	1.0784e-15	recombinase RecA	http://www.genome.jp/dbget-bin/www_bget?pfn:HZ99_11155
HZ99_RS11035	4330.67	1705.26	1.3446	6.025e-14	4.7153e-13	argininosuccinate synthase	http://www.genome.jp/dbget-bin/www_bget?pfn:HZ99_11325
HZ99_RS11055	9807	4085.74	1.2632	4.3824e-21	5.7326e-20	alkyl hydroperoxide reductase	http://www.genome.jp/dbget-bin/www_bget?pfn:HZ99_11345
HZ99_RS11060	666.421	152.708	2.1257	1.0331e-16	1.0172e-15	(2Fe-2S)-binding protein	http://www.genome.jp/dbget-bin/www_bget?pfn:HZ99_11350
HZ99_RS11070	2297.85	1014.84	1.179	5.347e-18	5.7264e-17	glutaredoxin	http://www.genome.jp/dbget-bin/www_bget?pfn:HZ99_11360
HZ99_RS11080	605.504	281.894	1.103	1.498e-12	1.0444e-11	ornithine carbamoyltransferase	http://www.genome.jp/dbget-bin/www_bget?pfn:HZ99_11370
HZ99_RS11085	498.587	235.926	1.0795	1.89e-11	1.1589e-10	iron ABC transporter ATP-binding protein	http://www.genome.jp/dbget-bin/www_bget?pfn:HZ99_11375
HZ99_RS11200	1628.12	634.389	1.3598	3.6177e-21	4.7664e-20	DSBA oxidoreductase	http://www.genome.jp/dbget-bin/www_bget?pfn:HZ99_11490
HZ99_RS11375	569.072	274.822	1.0501	3.391e-11	2.0206e-10	peptidase inhibitor I42	http://www.genome.jp/dbget-bin/www_bget?pfn:HZ99_11665
HZ99_RS11445	4236.25	1252.08	1.7585	6.5389e-27	1.2137e-25	cytosol aminopeptidase	http://www.genome.jp/dbget-bin/www_bget?pfn:HZ99_11735
HZ99_RS11450	129.241	48.8258	1.4044	2.1342e-09	1.0331e-08	DNA polymerase III subunit chi	http://www.genome.jp/dbget-bin/www_bget?pfn:HZ99_11740
HZ99_RS11485	2982.38	738.862	2.0131	5.6546e-46	2.0043e-44	glutathione S-transferase	http://www.genome.jp/dbget-bin/www_bget?pfn:HZ99_11775
HZ99_RS11580	447.444	171.882	1.3803	3.4613e-16	3.2507e-15	carboxylesterase	http://www.genome.jp/dbget-bin/www_bget?pfn:HZ99_11870
HZ99_RS11610	10673.8	3784.03	1.4961	8.2028e-30	1.7201e-28	ATPase	http://www.genome.jp/dbget-bin/www_bget?pfn:HZ99_11900
HZ99_RS11820	644.835	319.526	1.013	5.7911e-11	3.3561e-10	murG; UDP-diphospho-muramoylpentapeptide beta-N-acetylglucosaminyltransferase	http://www.genome.jp/dbget-bin/www_bget?pfn:HZ99_12110
HZ99_RS11825	977.886	414.249	1.2392	6.2223e-17	6.261e-16	cell division protein FtsW	http://www.genome.jp/dbget-bin/www_bget?pfn:HZ99_12115
HZ99_RS11835	1131.82	555.29	1.0273	3.0114e-12	2.0226e-11	phospho-N-acetylmuramoyl-pentapeptide-transferase	http://www.genome.jp/dbget-bin/www_bget?pfn:HZ99_12125
HZ99_RS11850	1338.49	628.718	1.0901	3.81e-14	3.0469e-13	cell division protein	http://www.genome.jp/dbget-bin/www_bget?pfn:HZ99_12140
HZ99_RS11865	2497.11	883.284	1.4993	5.0677e-27	9.47e-26	cell division protein MraZ	http://www.genome.jp/dbget-bin/www_bget?pfn:HZ99_12155
HZ99_RS11935	603.142	249.66	1.2725	7.1712e-16	6.5664e-15	glycerate dehydrogenase	http://www.genome.jp/dbget-bin/www_bget?pfn:HZ99_12225
HZ99_RS11980	748.39	302.963	1.3046	8.0856e-06	2.3604e-05	hypothetical protein	http://www.genome.jp/dbget-bin/www_bget?pfn:HZ99_12270
HZ99_RS12005	1504.07	544.356	1.4662	2.3474e-16	2.2508e-15	aminopeptidase	http://www.genome.jp/dbget-bin/www_bget?pfn:HZ99_12300
HZ99_RS12255	2920.43	1182.9	1.3039	1.8645e-21	2.523e-20	cytochrome C	http://www.genome.jp/dbget-bin/www_bget?pfn:HZ99_12550
HZ99_RS12260	1940.04	936.635	1.0505	2.5128e-09	1.2036e-08	cytochrome B	http://www.genome.jp/dbget-bin/www_bget?pfn:HZ99_12555
HZ99_RS12290	232.571	115.86	1.0053	1.0179e-07	3.9578e-07	AraC family transcriptional regulator	http://www.genome.jp/dbget-bin/www_bget?pfn:HZ99_12585
HZ99_RS12305	357.475	157.949	1.1784	2.4492e-11	1.4803e-10	alpha/beta hydrolase	http://www.genome.jp/dbget-bin/www_bget?pfn:HZ99_12600
HZ99_RS12335	644.077	250.615	1.3618	2.2889e-18	2.5151e-17	peptide ABC transporter substrate-binding protein	http://www.genome.jp/dbget-bin/www_bget?pfn:HZ99_12630
HZ99_RS12425	270.411	114.321	1.2421	2.1861e-09	1.0563e-08	Fe(II)-dependent oxygenase	http://www.genome.jp/dbget-bin/www_bget?pfn:HZ99_12720
HZ99_RS12430	489.982	140.669	1.8004	1.4063e-18	1.5768e-17	ligand-gated channel protein	http://www.genome.jp/dbget-bin/www_bget?pfn:HZ99_12725
HZ99_RS12445	779.91	325.754	1.2595	2.7437e-16	2.5945e-15	FruA	http://www.genome.jp/dbget-bin/www_bget?pfn:HZ99_12740
HZ99_RS12485	1177.42	236.451	2.316	2.8986e-51	1.2539e-49	thymidine phosphorylase	http://www.genome.jp/dbget-bin/www_bget?pfn:HZ99_12785
HZ99_RS12715	3159.48	1346.07	1.2309	4.1159e-17	4.2109e-16	peptidylprolyl isomerase	http://www.genome.jp/dbget-bin/www_bget?pfn:HZ99_13015
HZ99_RS12720	482.856	190.695	1.3403	1.1399e-08	5.0751e-08	hypothetical protein	http://www.genome.jp/dbget-bin/www_bget?pfn:HZ99_13020
HZ99_RS12760	2012.27	798.967	1.3326	5.5667e-14	4.3878e-13	glutamate dehydrogenase	http://www.genome.jp/dbget-bin/www_bget?pfn:HZ99_13060
HZ99_RS12765	2737.68	1302.56	1.0716	4.5911e-13	3.3409e-12	ABC transporter ATP-binding protein	http://www.genome.jp/dbget-bin/www_bget?pfn:HZ99_13065
HZ99_RS12775	4912.89	2452	1.0026	2.0662e-13	1.5465e-12	glyA; serine hydroxymethyltransferase	http://www.genome.jp/dbget-bin/www_bget?pfn:HZ99_13075
HZ99_RS12810	348.433	168.182	1.0509	2.4409e-05	6.5997e-05	catalase	http://www.genome.jp/dbget-bin/www_bget?pfn:HZ99_13110
HZ99_RS12875	108.964	37.0826	1.555	1.391e-09	6.9037e-09	RNA polymerase sigma70	http://www.genome.jp/dbget-bin/www_bget?pfn:HZ99_13180
HZ99_RS12970	5948.8	1836.65	1.6955	1.3369e-15	1.2041e-14	ABC transporter substrate-binding protein	http://www.genome.jp/dbget-bin/www_bget?pfn:HZ99_13280
HZ99_RS12975	452.274	172.527	1.3904	1.3704e-16	1.3373e-15	membrane protein	http://www.genome.jp/dbget-bin/www_bget?pfn:HZ99_13285
HZ99_RS12980	846.124	346.441	1.2883	1.1127e-17	1.1689e-16	endonuclease	http://www.genome.jp/dbget-bin/www_bget?pfn:HZ99_13290
HZ99_RS12985	12326.9	5477.63	1.1702	1.6078e-15	1.4363e-14	cyclic nucleotide-binding protein	http://www.genome.jp/dbget-bin/www_bget?pfn:HZ99_13295
HZ99_RS12990	9453.94	3865.94	1.2901	1.0667e-17	1.1227e-16	transcriptional regulator	http://www.genome.jp/dbget-bin/www_bget?pfn:HZ99_13300
HZ99_RS13060	252.446	108.549	1.2176	4.883e-11	2.8449e-10	XRE family transcriptional regulator	http://www.genome.jp/dbget-bin/www_bget?pfn:HZ99_13385
HZ99_RS13090	535.29	219.519	1.286	2.384e-15	2.0724e-14	polyribonucleotide nucleotidyltransferase	http://www.genome.jp/dbget-bin/www_bget?pfn:HZ99_13415
HZ99_RS13105	1224.63	454.737	1.4292	5.739e-22	8.0433e-21	AsnC family transcriptional regulator	http://www.genome.jp/dbget-bin/www_bget?pfn:HZ99_13430
HZ99_RS13120	2819.44	1084.79	1.378	1.4583e-23	2.2569e-22	AMP nucleosidase	http://www.genome.jp/dbget-bin/www_bget?pfn:HZ99_13445
HZ99_RS13310	182.463	89.1138	1.0339	5.2602e-07	1.8245e-06	murein hydrolase transporter LrgA	http://www.genome.jp/dbget-bin/www_bget?pfn:HZ99_13635
HZ99_RS13375	1747.84	708.838	1.302	2.8084e-20	3.5226e-19	GNAT family acetyltransferase	http://www.genome.jp/dbget-bin/www_bget?pfn:HZ99_13700
HZ99_RS13400	944.893	279.123	1.7592	5.7945e-30	1.2244e-28	integrase	http://www.genome.jp/dbget-bin/www_bget?pfn:HZ99_22105
HZ99_RS13440	290.003	99.0494	1.5498	6.8473e-17	6.8523e-16	ArsR family transcriptional regulator	http://www.genome.jp/dbget-bin/www_bget?pfn:HZ99_13770
HZ99_RS13445	952.946	464.902	1.0355	7.1874e-12	4.6511e-11	alcohol dehydrogenase	http://www.genome.jp/dbget-bin/www_bget?pfn:HZ99_13775
HZ99_RS13535	542.001	234.952	1.2059	3.586e-10	1.8835e-09	NADP-dependent oxidoreductase	http://www.genome.jp/dbget-bin/www_bget?pfn:HZ99_13875
HZ99_RS13545	139.208	41.2596	1.7544	6.3027e-09	2.8712e-08	glutathione S-transferase	http://www.genome.jp/dbget-bin/www_bget?pfn:HZ99_06525
HZ99_RS13610	364.609	117.737	1.6308	9.6747e-16	8.8001e-15	hypothetical protein	http://www.genome.jp/dbget-bin/www_bget?pfn:HZ99_13950
HZ99_RS13615	1191.24	425.26	1.486	1.0939e-23	1.7025e-22	hypothetical protein	http://www.genome.jp/dbget-bin/www_bget?pfn:HZ99_13955
HZ99_RS13620	2111.34	1005.68	1.07	1.4255e-14	1.1795e-13	hypothetical protein	http://www.genome.jp/dbget-bin/www_bget?pfn:HZ99_13960
HZ99_RS13745	795.913	317.545	1.3257	2.8104e-18	3.0696e-17	AraC family transcriptional regulator	http://www.genome.jp/dbget-bin/www_bget?pfn:HZ99_14090
HZ99_RS13805	2708.29	1303.46	1.055	1.9238e-14	1.5846e-13	3,4-dihydroxy-2-butanone 4-phosphate synthase	http://www.genome.jp/dbget-bin/www_bget?pfn:HZ99_14155
HZ99_RS13835	873.362	434.625	1.0068	1.3476e-11	8.4423e-11	thioredoxin	http://www.genome.jp/dbget-bin/www_bget?pfn:HZ99_14185
HZ99_RS13845	158.206	70.8252	1.1595	1.6975e-07	6.4231e-07	hypothetical protein	http://www.genome.jp/dbget-bin/www_bget?pfn:HZ99_14195
HZ99_RS13880	1241.79	614.824	1.0142	3.4255e-12	2.2923e-11	dTDP-4-dehydrorhamnose reductase	http://www.genome.jp/dbget-bin/www_bget?pfn:HZ99_14230
HZ99_RS13900	1043.24	421.128	1.3087	4.1886e-19	4.9067e-18	trans-aconitate methyltransferase	http://www.genome.jp/dbget-bin/www_bget?pfn:HZ99_14250
HZ99_RS13920	34.3342	15.0765	1.1873	0.0027048	0.0053034	transposase	http://www.genome.jp/dbget-bin/www_bget?pfn:HZ99_21585
HZ99_RS13930	5910.97	2736.32	1.1112	4.6817e-17	4.7632e-16	integrase	http://www.genome.jp/dbget-bin/www_bget?pfn:HZ99_14280
HZ99_RS13955	2496.38	1142.95	1.1271	2.6144e-16	2.485e-15	catalase	http://www.genome.jp/dbget-bin/www_bget?pfn:HZ99_14305
HZ99_RS14020	5224.76	2579.11	1.0185	9.6073e-05	0.0002369	30S ribosomal protein S14	http://www.genome.jp/dbget-bin/www_bget?pfn:HZ99_14370
HZ99_RS14040	404.277	201.637	1.0036	0.0077321	0.013965	30S ribosomal protein S17	http://www.genome.jp/dbget-bin/www_bget?pfn:HZ99_14390
HZ99_RS14045	48.7997	20.6134	1.2433	0.00040456	0.00090389	50S ribosomal protein L29	http://www.genome.jp/dbget-bin/www_bget?pfn:HZ99_14395
HZ99_RS14125	15112.6	5518.97	1.4533	7.7701e-14	6.0125e-13	rplL; 50S ribosomal protein L7/L12	http://www.genome.jp/dbget-bin/www_bget?pfn:HZ99_14475
HZ99_RS14130	13002.4	5311.48	1.2916	4.3084e-08	1.7704e-07	rplJ; 50S ribosomal protein L10	http://www.genome.jp/dbget-bin/www_bget?pfn:HZ99_14480
HZ99_RS14235	2400.96	991.466	1.276	4.4753e-20	5.5377e-19	N-acetyl-gamma-glutamyl-phosphate reductase	http://www.genome.jp/dbget-bin/www_bget?pfn:HZ99_14585
HZ99_RS14240	393.962	189.571	1.0553	2.8921e-10	1.5293e-09	membrane protein	http://www.genome.jp/dbget-bin/www_bget?pfn:HZ99_14590
HZ99_RS14260	5364.39	2574.48	1.0591	1.646e-15	1.4656e-14	zinc-binding protein	http://www.genome.jp/dbget-bin/www_bget?pfn:HZ99_14610
HZ99_RS14275	442.291	125.484	1.8175	3.2003e-26	5.8414e-25	cyclic AMP receptor protein	http://www.genome.jp/dbget-bin/www_bget?pfn:HZ99_14625
HZ99_RS14330	374.288	93.3525	2.0034	2.8541e-20	3.5718e-19	polyamine ABC transporter permease	http://www.genome.jp/dbget-bin/www_bget?pfn:HZ99_14680
HZ99_RS14335	549.729	107.741	2.3512	8.8824e-43	2.8876e-41	polyamine ABC transporter substrate-binding protein	http://www.genome.jp/dbget-bin/www_bget?pfn:HZ99_14685
HZ99_RS14340	1253.9	149.867	3.0647	9.7304e-75	8.4855e-73	spermidine/putrescine ABC transporter substrate-binding protein	http://www.genome.jp/dbget-bin/www_bget?pfn:HZ99_14690
HZ99_RS14345	954.093	158.866	2.5863	2.1371e-58	1.1399e-56	spermidine/putrescine ABC transporter ATP-binding protein	http://www.genome.jp/dbget-bin/www_bget?pfn:HZ99_14695
HZ99_RS14400	459.177	214.381	1.0989	2.7594e-11	1.6569e-10	magnesium transporter ApaG	http://www.genome.jp/dbget-bin/www_bget?pfn:HZ99_14750
HZ99_RS14475	30.6886	10.5473	1.5408	0.00046707	0.001035	--	--
HZ99_RS14480	2017.02	618.133	1.7062	3.8818e-27	7.3428e-26	integrase	http://www.genome.jp/dbget-bin/www_bget?pfn:HZ99_14830
HZ99_RS14485	1356.04	314.722	2.1072	1.2657e-43	4.2925e-42	hypothetical protein	http://www.genome.jp/dbget-bin/www_bget?pfn:HZ99_14835
HZ99_RS14490	200.274	98.9061	1.0178	9.919e-07	3.3188e-06	hypothetical protein	http://www.genome.jp/dbget-bin/www_bget?pfn:HZ99_14840
HZ99_RS14545	153.207	63.5447	1.2696	1.483e-08	6.4868e-08	chromate resistance protein	http://www.genome.jp/dbget-bin/www_bget?pfn:HZ99_14895
HZ99_RS14550	291.673	138.071	1.0789	7.5886e-07	2.5752e-06	chromate transporter	http://www.genome.jp/dbget-bin/www_bget?pfn:HZ99_14900
HZ99_RS14570	456.675	220.336	1.0515	1.2487e-10	6.9718e-10	hypothetical protein	http://www.genome.jp/dbget-bin/www_bget?pfn:HZ99_14925
HZ99_RS14575	16.2415	4.3049	1.9156	0.0018606	0.0037458	hypothetical protein	http://www.genome.jp/dbget-bin/www_bget?pfn:HZ99_14930
HZ99_RS14580	800.221	334.034	1.2604	1.6175e-16	1.5618e-15	cytochrome C peroxidase	http://www.genome.jp/dbget-bin/www_bget?pfn:HZ99_14935
HZ99_RS14585	586.646	245.117	1.259	3.7897e-15	3.2634e-14	RND transporter	http://www.genome.jp/dbget-bin/www_bget?pfn:HZ99_14940
HZ99_RS14590	119.122	40.8525	1.5439	4.6684e-10	2.4219e-09	NreA	http://www.genome.jp/dbget-bin/www_bget?pfn:HZ99_14945
HZ99_RS14640	132.661	56.8626	1.2222	2.3888e-07	8.8023e-07	hypothetical protein	http://www.genome.jp/dbget-bin/www_bget?pfn:HZ99_14995
HZ99_RS14645	204.286	79.4284	1.3629	8.0058e-11	4.5485e-10	hypothetical protein	http://www.genome.jp/dbget-bin/www_bget?pfn:HZ99_15000
HZ99_RS14670	394.014	186.198	1.0814	5.2844e-10	2.7159e-09	acetyltransferase	http://www.genome.jp/dbget-bin/www_bget?pfn:HZ99_15025
HZ99_RS14695	84.4796	26.715	1.661	4.8569e-09	2.248e-08	NADPH-dependent FMN reductase	http://www.genome.jp/dbget-bin/www_bget?pfn:HZ99_15050
HZ99_RS14700	74.4622	31.8982	1.223	2.2928e-05	6.236e-05	ArsC family transcriptional regulator	http://www.genome.jp/dbget-bin/www_bget?pfn:HZ99_15055
HZ99_RS14835	7470.55	2993.62	1.3193	8.2166e-23	1.207e-21	acyl-CoA dehydrogenase	http://www.genome.jp/dbget-bin/www_bget?pfn:HZ99_15195
HZ99_RS14855	415.632	196.211	1.0829	4.2243e-11	2.4795e-10	dethiobiotin synthetase	http://www.genome.jp/dbget-bin/www_bget?pfn:HZ99_15220
HZ99_RS14875	315.745	153.517	1.0404	8.5269e-09	3.8462e-08	biotin synthase	http://www.genome.jp/dbget-bin/www_bget?pfn:HZ99_15240
HZ99_RS14905	5949.72	1870.86	1.6691	1.8756e-34	4.6838e-33	malate synthase	http://www.genome.jp/dbget-bin/www_bget?pfn:HZ99_15270
HZ99_RS14925	254.763	79.6959	1.6766	3.6349e-09	1.7113e-08	RNA polymerase sigma factor	http://www.genome.jp/dbget-bin/www_bget?pfn:HZ99_15290
HZ99_RS15030	1168.1	514.995	1.1815	3.9789e-13	2.9108e-12	threonine aldolase	http://www.genome.jp/dbget-bin/www_bget?pfn:HZ99_15395
HZ99_RS15110	592.577	244.811	1.2753	5.0782e-16	4.7128e-15	hypothetical protein	http://www.genome.jp/dbget-bin/www_bget?pfn:HZ99_15475
HZ99_RS15160	3734.44	1037.02	1.8485	1.0849e-39	3.275e-38	dimethylmenaquinone methyltransferase	http://www.genome.jp/dbget-bin/www_bget?pfn:HZ99_15525
HZ99_RS15165	1106.97	471.902	1.2301	2.4369e-17	2.5214e-16	peptidase C69	http://www.genome.jp/dbget-bin/www_bget?pfn:HZ99_15530
HZ99_RS15170	885.7	389.706	1.1844	1.6132e-15	1.4388e-14	Zn-dependent protease	http://www.genome.jp/dbget-bin/www_bget?pfn:HZ99_15535
HZ99_RS15175	1733.18	765.604	1.1788	7.6992e-17	7.663e-16	MFS transporter	http://www.genome.jp/dbget-bin/www_bget?pfn:HZ99_15540
HZ99_RS15180	885.118	427.066	1.0514	1.8642e-08	8.0457e-08	EmrB/QacA subfamily drug resistance transporter	http://www.genome.jp/dbget-bin/www_bget?pfn:HZ99_15545
HZ99_RS15205	831.735	378.055	1.1375	4.4585e-14	3.55e-13	acyltransferase	http://www.genome.jp/dbget-bin/www_bget?pfn:HZ99_15570
HZ99_RS15225	506.741	99.0842	2.3545	1.1292e-40	3.5249e-39	alginate lyase	http://www.genome.jp/dbget-bin/www_bget?pfn:HZ99_15590
HZ99_RS15260	9826	4390.47	1.1622	4.6643e-18	5.0148e-17	transketolase	http://www.genome.jp/dbget-bin/www_bget?pfn:HZ99_15625
HZ99_RS15275	958.218	410.676	1.2224	0.00040436	0.0009038	hypothetical protein	http://www.genome.jp/dbget-bin/www_bget?pfn:HZ99_15640
HZ99_RS15325	723.854	290.99	1.3147	8.3596e-13	5.9569e-12	thioesterase	http://www.genome.jp/dbget-bin/www_bget?pfn:HZ99_15695
HZ99_RS15480	682.44	314.233	1.1189	2.1005e-13	1.5701e-12	chemotaxis protein CheY	http://www.genome.jp/dbget-bin/www_bget?pfn:HZ99_15855
HZ99_RS15485	1082.75	533.576	1.0209	1.1408e-12	8.0662e-12	pilus assembly protein PilG	http://www.genome.jp/dbget-bin/www_bget?pfn:HZ99_15860
HZ99_RS15490	1710.75	663.581	1.3663	1.2641e-21	1.745e-20	glutathione synthetase	http://www.genome.jp/dbget-bin/www_bget?pfn:HZ99_15865
HZ99_RS15545	1813.5	796.797	1.1865	1.1341e-13	8.6657e-13	pyrroline-5-carboxylate reductase	http://www.genome.jp/dbget-bin/www_bget?pfn:HZ99_15920
HZ99_RS15550	1945.36	584.45	1.7349	2.7478e-33	6.4792e-32	membrane protein	http://www.genome.jp/dbget-bin/www_bget?pfn:HZ99_15925
HZ99_RS15600	373.574	168.446	1.1491	1.5146e-09	7.4897e-09	membrane protein	http://www.genome.jp/dbget-bin/www_bget?pfn:HZ99_15975
HZ99_RS15690	645.767	309.281	1.0621	9.4643e-12	6.0461e-11	histidine kinase	http://www.genome.jp/dbget-bin/www_bget?pfn:HZ99_16065
HZ99_RS15700	2631.07	1271.22	1.0494	4.4555e-14	3.55e-13	dihydroxy-acid dehydratase	http://www.genome.jp/dbget-bin/www_bget?pfn:HZ99_16075
HZ99_RS15765	584.7	282.577	1.0491	2.1545e-11	1.3108e-10	Cd(II)/Pb(II)-responsive transcriptional regulator	http://www.genome.jp/dbget-bin/www_bget?pfn:HZ99_16140
HZ99_RS15785	5601.43	2613.61	1.0998	2.4375e-16	2.329e-15	phosphoenolpyruvate-protein phosphotransferase	http://www.genome.jp/dbget-bin/www_bget?pfn:HZ99_16160
HZ99_RS15790	1797.66	790.757	1.1848	1.6695e-17	1.7438e-16	RNA pyrophosphohydrolase	http://www.genome.jp/dbget-bin/www_bget?pfn:HZ99_16165
HZ99_RS15795	739.278	261.437	1.4997	1.5627e-21	2.1356e-20	phosphoserine phosphatase	http://www.genome.jp/dbget-bin/www_bget?pfn:HZ99_16170
HZ99_RS15815	445.706	208.775	1.0941	3.2769e-11	1.9569e-10	membrane protein	http://www.genome.jp/dbget-bin/www_bget?pfn:HZ99_16190
HZ99_RS15830	1350.6	657.218	1.0392	3.6649e-13	2.6847e-12	hypothetical protein	http://www.genome.jp/dbget-bin/www_bget?pfn:HZ99_16205
HZ99_RS15840	4822.2	2262.25	1.0919	1.8849e-15	1.6649e-14	3-phosphoglycerate dehydrogenase	http://www.genome.jp/dbget-bin/www_bget?pfn:HZ99_16215
HZ99_RS15915	3029.14	1497.39	1.0165	5.8605e-14	4.5931e-13	spermidine/putrescine ABC transporter substrate-binding protein	http://www.genome.jp/dbget-bin/www_bget?pfn:HZ99_16290
HZ99_RS15930	662.011	330.811	1.0008	1.0977e-10	6.1662e-10	gamma-glutamyl-gamma-aminobutyrate hydrolase	http://www.genome.jp/dbget-bin/www_bget?pfn:HZ99_16305
HZ99_RS15935	5748.27	1979.76	1.5378	7.9353e-15	6.6866e-14	gamma-glutamylputrescine synthetase	http://www.genome.jp/dbget-bin/www_bget?pfn:HZ99_16310
HZ99_RS15945	16.318	6.60307	1.3053	0.024496	0.039699	transporter	http://www.genome.jp/dbget-bin/www_bget?pfn:HZ99_16320
HZ99_RS16010	1022.49	84.0412	3.6048	8.4724e-100	1.1935e-97	hypothetical protein	http://www.genome.jp/dbget-bin/www_bget?pfn:HZ99_16385
HZ99_RS16015	342.601	158.645	1.1107	1.2688e-10	7.0624e-10	type II secretion system protein E	http://www.genome.jp/dbget-bin/www_bget?pfn:HZ99_16390
HZ99_RS16020	1114.47	461.037	1.2734	7.6591e-18	8.1391e-17	protease	http://www.genome.jp/dbget-bin/www_bget?pfn:HZ99_16395
HZ99_RS16055	2434.37	685.282	1.8288	1.3704e-38	3.9214e-37	iron ABC transporter substrate-binding protein	http://www.genome.jp/dbget-bin/www_bget?pfn:HZ99_16430
HZ99_RS16080	567.604	277.814	1.0308	7.1226e-11	4.0804e-10	hypothetical protein	http://www.genome.jp/dbget-bin/www_bget?pfn:HZ99_16455
HZ99_RS16155	1878.51	930.821	1.013	7.0838e-13	5.0675e-12	3-octaprenyl-4-hydroxybenzoate carboxy-lyase	http://www.genome.jp/dbget-bin/www_bget?pfn:HZ99_16535
HZ99_RS16165	5203.2	1962.05	1.407	1.3486e-18	1.5183e-17	thioredoxin	http://www.genome.jp/dbget-bin/www_bget?pfn:HZ99_16545
HZ99_RS16215	1456.39	727.27	1.0018	2.3289e-12	1.5855e-11	isoprenoid biosynthesis protein	http://www.genome.jp/dbget-bin/www_bget?pfn:HZ99_16595
HZ99_RS16220	1349.25	667.742	1.0148	1.5916e-12	1.1055e-11	cystathionine gamma-synthase	http://www.genome.jp/dbget-bin/www_bget?pfn:HZ99_16600
HZ99_RS16245	1249.53	436.694	1.5167	2.4307e-25	4.1953e-24	threonine transporter RhtB	http://www.genome.jp/dbget-bin/www_bget?pfn:HZ99_16625
HZ99_RS16275	2554.04	804.088	1.6674	1.4548e-32	3.3582e-31	transcriptional regulator	http://www.genome.jp/dbget-bin/www_bget?pfn:HZ99_16655
HZ99_RS16330	4128.59	1849.68	1.1584	4.144e-18	4.4906e-17	DNA-binding protein	http://www.genome.jp/dbget-bin/www_bget?pfn:HZ99_16710
HZ99_RS16340	731.572	347.848	1.0725	5.5412e-12	3.6286e-11	nucleoside diphosphate kinase regulator	http://www.genome.jp/dbget-bin/www_bget?pfn:HZ99_16720
HZ99_RS16350	226.454	100.865	1.1668	1.462e-08	6.4003e-08	frataxin	http://www.genome.jp/dbget-bin/www_bget?pfn:HZ99_16730
HZ99_RS16415	758.071	307.83	1.3002	5.4607e-17	5.525e-16	--	--
HZ99_RS16425	7052.46	3241.74	1.1214	1.0697e-16	1.0514e-15	hypothetical protein	http://www.genome.jp/dbget-bin/www_bget?pfn:HZ99_03700
HZ99_RS16430	1274.91	568.08	1.1662	5.5828e-16	5.1463e-15	hypothetical protein	http://www.genome.jp/dbget-bin/www_bget?pfn:HZ99_16810
HZ99_RS16470	1970.98	961.394	1.0357	9.101e-14	7.0029e-13	acetyl-CoA hydrolase	http://www.genome.jp/dbget-bin/www_bget?pfn:HZ99_16850
HZ99_RS16530	325.211	150.69	1.1098	1.3994e-10	7.7345e-10	MFS transporter	http://www.genome.jp/dbget-bin/www_bget?pfn:HZ99_16910
HZ99_RS16535	15593.4	3676.46	2.0846	7.8338e-53	3.5278e-51	aldehyde dehydrogenase	http://www.genome.jp/dbget-bin/www_bget?pfn:HZ99_16915
HZ99_RS16540	5155.75	1287.48	2.0016	3.3452e-47	1.2763e-45	transcriptional regulator	http://www.genome.jp/dbget-bin/www_bget?pfn:HZ99_16920
HZ99_RS16565	1317.88	572.063	1.204	1.3292e-16	1.2994e-15	phosphopantothenoylcysteine decarboxylase	http://www.genome.jp/dbget-bin/www_bget?pfn:HZ99_16945
HZ99_RS16640	1452.21	378.07	1.9415	1.8193e-16	1.7474e-15	biopolymer transporter ExbB	http://www.genome.jp/dbget-bin/www_bget?pfn:HZ99_17020
HZ99_RS16655	1029.49	514.633	1.0003	8.449e-12	5.4291e-11	LysR family transcriptional regulator	http://www.genome.jp/dbget-bin/www_bget?pfn:HZ99_17035
HZ99_RS16695	1488.99	679.555	1.1317	2.0921e-15	1.8332e-14	pyridine nucleotide-disulfide oxidoreductase	http://www.genome.jp/dbget-bin/www_bget?pfn:HZ99_17075
HZ99_RS16745	275.648	114.4	1.2687	6.3489e-12	4.1377e-11	transcriptional regulator PhoU	http://www.genome.jp/dbget-bin/www_bget?pfn:HZ99_17125
HZ99_RS16750	286.828	138.96	1.0455	5.1166e-09	2.3622e-08	phosphate ABC transporter ATP-binding protein	http://www.genome.jp/dbget-bin/www_bget?pfn:HZ99_17130
HZ99_RS16765	898.483	386.595	1.2167	3.6697e-16	3.4347e-15	phosphate-binding protein	http://www.genome.jp/dbget-bin/www_bget?pfn:HZ99_17145
HZ99_RS16775	1180.67	581.028	1.0229	9.6294e-13	6.844e-12	long-chain acyl-CoA thioester hydrolase	http://www.genome.jp/dbget-bin/www_bget?pfn:HZ99_17155
HZ99_RS16820	582.664	227.808	1.3548	1.9897e-08	8.5403e-08	asparaginase	http://www.genome.jp/dbget-bin/www_bget?pfn:HZ99_17200
HZ99_RS16875	11342.5	2344.14	2.2746	8.5116e-48	3.3165e-46	pyruvate carboxylase subunit B	http://www.genome.jp/dbget-bin/www_bget?pfn:HZ99_17255
HZ99_RS16880	12311.2	3711.82	1.7298	1.5913e-38	4.5065e-37	pyruvate carboxylase subunit A	http://www.genome.jp/dbget-bin/www_bget?pfn:HZ99_17260
HZ99_RS17055	383.755	161.769	1.2462	1.2382e-13	9.4352e-13	CDP-alcohol phosphatidyltransferase	http://www.genome.jp/dbget-bin/www_bget?pfn:HZ99_17435
HZ99_RS17340	923.938	445.836	1.0513	1.9099e-12	1.3116e-11	glucosamine--fructose-6-phosphate aminotransferase	http://www.genome.jp/dbget-bin/www_bget?pfn:HZ99_17745
HZ99_RS17455	1598.07	756.456	1.079	3.2418e-14	2.6154e-13	transcriptional regulator	http://www.genome.jp/dbget-bin/www_bget?pfn:HZ99_17860
HZ99_RS17540	2381.81	656.428	1.8593	3.1732e-39	9.3727e-38	quinone oxidoreductase	http://www.genome.jp/dbget-bin/www_bget?pfn:HZ99_17945
HZ99_RS17575	305.307	150.742	1.0182	8.1931e-09	3.6987e-08	4,5-dioxygenase	http://www.genome.jp/dbget-bin/www_bget?pfn:HZ99_17980
HZ99_RS17630	4493.47	2044.94	1.1358	2.765e-06	8.6215e-06	hypothetical protein	http://www.genome.jp/dbget-bin/www_bget?pfn:HZ99_18035
HZ99_RS17655	304.155	124.202	1.2921	2.1932e-10	1.1836e-09	HAD family hydrolase	http://www.genome.jp/dbget-bin/www_bget?pfn:HZ99_18060
HZ99_RS17660	384.397	177.128	1.1178	5.2414e-11	3.0472e-10	anhydrase	http://www.genome.jp/dbget-bin/www_bget?pfn:HZ99_18065
HZ99_RS17665	7392.76	3076.23	1.2649	2.3022e-12	1.5692e-11	oligopeptidase A	http://www.genome.jp/dbget-bin/www_bget?pfn:HZ99_18070
HZ99_RS17670	371.515	100.332	1.8886	3.5402e-14	2.8435e-13	DNA-binding protein	http://www.genome.jp/dbget-bin/www_bget?pfn:HZ99_18075
HZ99_RS17690	724.917	249.045	1.5414	3.0367e-22	4.3334e-21	alcohol dehydrogenase	http://www.genome.jp/dbget-bin/www_bget?pfn:HZ99_18095
HZ99_RS17810	1966.11	946.293	1.055	2.0953e-14	1.7156e-13	hypothetical protein	http://www.genome.jp/dbget-bin/www_bget?pfn:HZ99_18215
HZ99_RS17880	843.664	380.027	1.1506	0.014165	0.024198	glutamate:protein symporter	http://www.genome.jp/dbget-bin/www_bget?pfn:HZ99_18285
HZ99_RS17980	386.235	167.334	1.2068	2.1012e-12	1.4358e-11	LysR family transcriptional regulator	http://www.genome.jp/dbget-bin/www_bget?pfn:HZ99_18385
HZ99_RS17985	6794.03	1427.48	2.2508	1.3798e-53	6.4793e-52	acyl-CoA dehydrogenase	http://www.genome.jp/dbget-bin/www_bget?pfn:HZ99_18390
HZ99_RS17990	1949.9	672.784	1.5352	5.5869e-28	1.1002e-26	CoA-transferase	http://www.genome.jp/dbget-bin/www_bget?pfn:HZ99_18395
HZ99_RS18075	7012.74	3352.41	1.0648	2.1286e-10	1.1522e-09	channel protein TolC	http://www.genome.jp/dbget-bin/www_bget?pfn:HZ99_18480
HZ99_RS18130	134.579	48.0441	1.486	6.2445e-08	2.5189e-07	RNA polymerase sigma factor	http://www.genome.jp/dbget-bin/www_bget?pfn:HZ99_18535
HZ99_RS18150	1326.13	619.939	1.097	4.7664e-12	3.1399e-11	hypothetical protein	http://www.genome.jp/dbget-bin/www_bget?pfn:HZ99_18555
HZ99_RS18190	2422.65	1177.77	1.0405	3.2817e-12	2.1987e-11	hypothetical protein	http://www.genome.jp/dbget-bin/www_bget?pfn:HZ99_18595
HZ99_RS18285	1331.82	645.356	1.0452	2.5706e-13	1.9111e-12	hypothetical protein	http://www.genome.jp/dbget-bin/www_bget?pfn:HZ99_18690
HZ99_RS18310	117.37	46.0289	1.3504	1.1616e-05	3.3205e-05	DNA-binding protein	http://www.genome.jp/dbget-bin/www_bget?pfn:HZ99_18715
HZ99_RS18360	9799.31	3423.48	1.5172	1.3065e-29	2.6783e-28	gabD; succinate-semialdehyde dehydrogenase	http://www.genome.jp/dbget-bin/www_bget?pfn:HZ99_18765
HZ99_RS18365	10546.7	2453.76	2.1037	2.2091e-53	1.0199e-51	4-aminobutyrate aminotransferase	http://www.genome.jp/dbget-bin/www_bget?pfn:HZ99_18770
HZ99_RS18905	277.947	123.148	1.1744	1.3521e-10	7.4805e-10	amino acid ABC transporter permease	http://www.genome.jp/dbget-bin/www_bget?pfn:HZ99_19330
HZ99_RS18910	1959.53	667.709	1.5532	8.172e-28	1.5809e-26	cystine transporter subunit	http://www.genome.jp/dbget-bin/www_bget?pfn:HZ99_19335
HZ99_RS18965	3463.63	1665.17	1.0566	1.085e-14	9.0319e-14	chemotaxis protein CheY	http://www.genome.jp/dbget-bin/www_bget?pfn:HZ99_19390
HZ99_RS18990	681.976	246.036	1.4708	5.1845e-20	6.3722e-19	phosphoesterase	http://www.genome.jp/dbget-bin/www_bget?pfn:HZ99_19415
HZ99_RS19100	2645.43	823.924	1.6829	9.8744e-34	2.4004e-32	hypothetical protein	http://www.genome.jp/dbget-bin/www_bget?pfn:HZ99_19525
HZ99_RS19105	1728.88	722.449	1.2589	2.5912e-16	2.4672e-15	carbon-nitrogen hydrolase	http://www.genome.jp/dbget-bin/www_bget?pfn:HZ99_19530
HZ99_RS19110	1276.15	524.304	1.2833	3.9011e-08	1.6072e-07	agmatine deiminase	http://www.genome.jp/dbget-bin/www_bget?pfn:HZ99_19535
HZ99_RS19130	7161.53	2217.81	1.6911	6.4514e-35	1.6409e-33	porin	http://www.genome.jp/dbget-bin/www_bget?pfn:HZ99_10665
HZ99_RS19205	35.4158	11.4463	1.6295	0.00027042	0.00062271	--	--
HZ99_RS19270	181.072	79.1197	1.1945	6.2062e-09	2.832e-08	iron transporter	http://www.genome.jp/dbget-bin/www_bget?pfn:HZ99_19700
HZ99_RS19285	1004.72	442.288	1.1837	1.9761e-15	1.7371e-14	MFS transporter	http://www.genome.jp/dbget-bin/www_bget?pfn:HZ99_19715
HZ99_RS19290	948.595	413.703	1.1972	1.1205e-15	1.0125e-14	imidazoleglycerol-phosphate dehydratase	http://www.genome.jp/dbget-bin/www_bget?pfn:HZ99_19720
HZ99_RS19300	15.1025	2.43764	2.6312	0.00072532	0.001559	1-(5-phosphoribosyl)-5-[(5-phosphoribosylamino)methylideneamino] imidazole-4-carboxamide isomerase	http://www.genome.jp/dbget-bin/www_bget?pfn:HZ99_19730
HZ99_RS19355	95.492	41.3878	1.2062	2.2451e-06	7.1462e-06	glutaredoxin	http://www.genome.jp/dbget-bin/www_bget?pfn:HZ99_19785
HZ99_RS19360	3662.6	1434.77	1.3521	5.2813e-19	6.1343e-18	preprotein translocase subunit SecB	http://www.genome.jp/dbget-bin/www_bget?pfn:HZ99_19790
HZ99_RS19580	271.428	128.024	1.0842	5.3159e-09	2.4522e-08	hisI; phosphoribosyl-AMP cyclohydrolase	http://www.genome.jp/dbget-bin/www_bget?pfn:HZ99_20015
HZ99_RS19600	353.924	132.446	1.418	9.9657e-16	9.0349e-15	polyhydroxyalkanoic acid system protein	http://www.genome.jp/dbget-bin/www_bget?pfn:HZ99_20035
HZ99_RS19640	196.153	95.579	1.0372	2.4594e-07	9.0379e-07	LysR family transcriptional regulator	http://www.genome.jp/dbget-bin/www_bget?pfn:HZ99_20075
HZ99_RS19675	345.824	154.681	1.1607	0.00010336	0.00025441	1-(5-phosphoribosyl)-5-[(5-phosphoribosylamino)methylideneamino] imidazole-4-carboxamide isomerase	http://www.genome.jp/dbget-bin/www_bget?pfn:HZ99_20110
HZ99_RS19680	9055.94	4393.3	1.0436	9.4844e-10	4.7761e-09	hslU; ATP-dependent protease ATP-binding subunit HslU	http://www.genome.jp/dbget-bin/www_bget?pfn:HZ99_20115
HZ99_RS19715	5790.45	2031.17	1.5114	9.8199e-20	1.1883e-18	malate dehydrogenase	http://www.genome.jp/dbget-bin/www_bget?pfn:HZ99_20150
HZ99_RS19765	6820.81	1964.32	1.7959	2.4099e-12	1.6366e-11	gltB; glutamate synthase	http://www.genome.jp/dbget-bin/www_bget?pfn:HZ99_20200
HZ99_RS19770	2066.89	545.037	1.923	1.7098e-40	5.2772e-39	glutamate synthase	http://www.genome.jp/dbget-bin/www_bget?pfn:HZ99_20205
HZ99_RS19890	1478.89	733.526	1.0116	9.6534e-13	6.8522e-12	cobalamin biosynthesis protein CobQ	http://www.genome.jp/dbget-bin/www_bget?pfn:HZ99_20325
HZ99_RS19895	2244.38	1019.58	1.1383	4.1943e-09	1.9645e-08	thioredoxin	http://www.genome.jp/dbget-bin/www_bget?pfn:HZ99_20330
HZ99_RS19910	994.331	411.429	1.2731	3.2889e-18	3.5781e-17	cvrA; potassium/proton antiporter	http://www.genome.jp/dbget-bin/www_bget?pfn:HZ99_20345
HZ99_RS19960	5346.26	2175.58	1.2971	1.9431e-09	9.4555e-09	dihydrolipoamide acetyltransferase	http://www.genome.jp/dbget-bin/www_bget?pfn:HZ99_20400
HZ99_RS19970	2770.91	1222.79	1.1802	5.4517e-18	5.8272e-17	bifunctional glutamine-synthetase adenylyltransferase/deadenyltransferase	http://www.genome.jp/dbget-bin/www_bget?pfn:HZ99_20410
HZ99_RS20135	1370.79	596.325	1.2008	3.3316e-17	3.4341e-16	hypothetical protein	http://www.genome.jp/dbget-bin/www_bget?pfn:HZ99_20575
HZ99_RS20260	560.529	251.611	1.1556	1.2906e-12	9.0787e-12	iron ABC transporter substrate-binding protein	http://www.genome.jp/dbget-bin/www_bget?pfn:HZ99_20700
HZ99_RS20270	56.2403	26.4013	1.091	0.00035317	0.00079751	--	--
HZ99_RS20335	1386.99	645.604	1.1032	1.145e-14	9.5026e-14	nadE; NAD synthetase	http://www.genome.jp/dbget-bin/www_bget?pfn:HZ99_20785
HZ99_RS20385	2538.56	747.309	1.7642	1.1642e-35	2.9889e-34	hypothetical protein	http://www.genome.jp/dbget-bin/www_bget?pfn:HZ99_20835
HZ99_RS20675	269.271	114.759	1.2304	2.7972e-11	1.6759e-10	3-dehydroquinate dehydratase	http://www.genome.jp/dbget-bin/www_bget?pfn:HZ99_21125
HZ99_RS20730	166.577	57.2961	1.5397	1.5692e-12	1.0926e-11	pyrophosphatase	http://www.genome.jp/dbget-bin/www_bget?pfn:HZ99_21180
HZ99_RS20910	672.257	316.661	1.0861	3.7422e-12	2.4982e-11	adenine deaminase	http://www.genome.jp/dbget-bin/www_bget?pfn:HZ99_21355
HZ99_RS20925	611.186	302.676	1.0138	1.1737e-10	6.5667e-10	short-chain dehydrogenase	http://www.genome.jp/dbget-bin/www_bget?pfn:HZ99_21370
HZ99_RS20935	363.281	158.728	1.1945	1.0439e-08	4.6663e-08	TetR family transcriptional regulator	http://www.genome.jp/dbget-bin/www_bget?pfn:HZ99_21380
HZ99_RS20945	571.817	227.03	1.3327	3.1093e-16	2.9351e-15	LysR family transcriptional regulator	http://www.genome.jp/dbget-bin/www_bget?pfn:HZ99_21390
HZ99_RS20950	3207.91	910.369	1.8171	5.5222e-14	4.3591e-13	omega amino acid--pyruvate aminotransferase	http://www.genome.jp/dbget-bin/www_bget?pfn:HZ99_21395
HZ99_RS20955	3713.55	874.459	2.0863	2.4899e-50	1.0285e-48	methylmalonate-semialdehyde dehydrogenase	http://www.genome.jp/dbget-bin/www_bget?pfn:HZ99_21400
HZ99_RS21015	493.201	230.336	1.0984	1.005e-11	6.3834e-11	LysR family transcriptional regulator	http://www.genome.jp/dbget-bin/www_bget?pfn:HZ99_21460
HZ99_RS21140	279.63	98.8069	1.5008	1.656e-15	1.4722e-14	hypothetical protein	http://www.genome.jp/dbget-bin/www_bget?pfn:HZ99_21600
HZ99_RS21180	62.2462	20.588	1.5962	3.8468e-05	0.00010069	mercury transporter	http://www.genome.jp/dbget-bin/www_bget?pfn:HZ99_21645
HZ99_RS21370	913.593	446.356	1.0334	1.9707e-12	1.3517e-11	DNA polymerase V subunit UmuC	http://www.genome.jp/dbget-bin/www_bget?pfn:HZ99_21565
HZ99_RS21615	1747.22	872.549	1.0018	4.8682e-10	2.5208e-09	restriction endonuclease	http://www.genome.jp/dbget-bin/www_bget?pfn:HZ99_22095
HZ99_RS21625	88.2499	42.146	1.0662	2.2109e-05	6.0251e-05	integrase	http://www.genome.jp/dbget-bin/www_bget?pfn:HZ99_22105
HZ99_RS21655	451.846	221.71	1.0272	1.2617e-10	7.0345e-10	ribosome association toxin RatA	http://www.genome.jp/dbget-bin/www_bget?pfn:HZ99_22135
HZ99_RS21720	1219.92	577.777	1.0782	1.3436e-13	1.0196e-12	RNA-binding protein	http://www.genome.jp/dbget-bin/www_bget?pfn:HZ99_22200
HZ99_RS21830	740.592	354.946	1.0611	1.3144e-07	5.0463e-07	pantoate--beta-alanine ligase	http://www.genome.jp/dbget-bin/www_bget?pfn:HZ99_22310
HZ99_RS21835	1549.17	701.96	1.142	2.686e-15	2.3313e-14	panB; 3-methyl-2-oxobutanoate hydroxymethyltransferase	http://www.genome.jp/dbget-bin/www_bget?pfn:HZ99_22315
HZ99_RS21890	591.007	202.558	1.5448	2.0656e-22	2.9751e-21	ABC transporter substrate-binding protein	http://www.genome.jp/dbget-bin/www_bget?pfn:HZ99_22370
HZ99_RS21930	95.0226	46.6032	1.0278	2.608e-05	7.0135e-05	pseudouridine synthase	http://www.genome.jp/dbget-bin/www_bget?pfn:HZ99_22410
HZ99_RS21935	5110.85	1732.66	1.5606	2.677e-30	5.8132e-29	acetolactate synthase 3 catalytic subunit IlvI	http://www.genome.jp/dbget-bin/www_bget?pfn:HZ99_22415
HZ99_RS21940	635.897	202.657	1.6498	1.5477e-24	2.5383e-23	acetolactate synthase 3 regulatory subunit IlvH	http://www.genome.jp/dbget-bin/www_bget?pfn:HZ99_22420
HZ99_RS21945	7284.44	2961.12	1.2987	3.5328e-21	4.6657e-20	ketol-acid reductoisomerase IlvC	http://www.genome.jp/dbget-bin/www_bget?pfn:HZ99_22425
HZ99_RS22055	973.588	473.954	1.0386	1.636e-12	1.1349e-11	cation transporter	http://www.genome.jp/dbget-bin/www_bget?pfn:HZ99_22535
HZ99_RS22060	515.977	76.3934	2.7558	1.1206e-51	4.9252e-50	transcriptional regulator	http://www.genome.jp/dbget-bin/www_bget?pfn:HZ99_22540
HZ99_RS22065	880.1	116.835	2.9132	2.4156e-40	7.414e-39	type I secretion protein TolC	http://www.genome.jp/dbget-bin/www_bget?pfn:HZ99_22545
HZ99_RS22070	399.691	61.3313	2.7042	1.0968e-44	3.8137e-43	cytochrome C peroxidase	http://www.genome.jp/dbget-bin/www_bget?pfn:HZ99_22550
HZ99_RS22075	988.533	179.832	2.4586	7.4973e-55	3.7446e-53	cation transporter	http://www.genome.jp/dbget-bin/www_bget?pfn:HZ99_22555
HZ99_RS22090	1413.08	24.3656	5.8579	3.209e-187	1.9589e-184	hypothetical protein	http://www.genome.jp/dbget-bin/www_bget?pfn:HZ99_22570
HZ99_RS22095	4364.47	109.272	5.3198	2.4239e-175	1.0244e-172	porin	http://www.genome.jp/dbget-bin/www_bget?pfn:HZ99_22575
HZ99_RS22100	132.261	14.0906	3.2306	6.8819e-28	1.3503e-26	hypothetical protein	http://www.genome.jp/dbget-bin/www_bget?pfn:HZ99_22580
HZ99_RS22110	417.978	190.495	1.1337	1.5197e-11	9.4237e-11	GNAT family acetyltransferase	http://www.genome.jp/dbget-bin/www_bget?pfn:HZ99_22590
HZ99_RS22120	634.729	241.352	1.395	1.7825e-18	1.9824e-17	D-alanine--D-alanine ligase	http://www.genome.jp/dbget-bin/www_bget?pfn:HZ99_22600
HZ99_RS22155	46.5557	15.5205	1.5848	0.00014561	0.0003498	--	--
HZ99_RS22160	652.517	285.415	1.193	1.572e-14	1.2988e-13	Fosmidomycin resistance protein	http://www.genome.jp/dbget-bin/www_bget?pfn:HZ99_22650
HZ99_RS22475	1802.56	577.042	1.6433	2.6309e-30	5.7586e-29	thioredoxin reductase	http://www.genome.jp/dbget-bin/www_bget?pfn:HZ99_22980
HZ99_RS22610	333.761	147.238	1.1807	4.066e-11	2.3917e-10	serine/threonine protein kinase	http://www.genome.jp/dbget-bin/www_bget?pfn:HZ99_23115
HZ99_RS22615	576.136	281.95	1.031	6.3783e-11	3.6771e-10	serine dehydratase	http://www.genome.jp/dbget-bin/www_bget?pfn:HZ99_23120
HZ99_RS22625	25888.9	9765.28	1.4066	2.1547e-26	3.9858e-25	ribosomal subunit interface protein	http://www.genome.jp/dbget-bin/www_bget?pfn:HZ99_23130
HZ99_RS22640	184.029	73.2946	1.3282	3.5401e-06	1.0884e-05	RNA polymerase sigma factor	http://www.genome.jp/dbget-bin/www_bget?pfn:HZ99_23145
HZ99_RS22670	9.44701	1.81419	2.3805	0.024009	0.039002	50S ribosomal protein L36	http://www.genome.jp/dbget-bin/www_bget?pfn:HZ99_23175
HZ99_RS22795	1030.85	358.695	1.523	3.6496e-24	5.9148e-23	diguanylate cyclase	http://www.genome.jp/dbget-bin/www_bget?pfn:HZ99_23300
HZ99_RS22905	190.628	74.8177	1.3493	1.7503e-10	9.5591e-10	hypothetical protein	http://www.genome.jp/dbget-bin/www_bget?pfn:HZ99_23415
HZ99_RS23105	1042.09	475.831	1.131	3.7497e-15	3.2341e-14	aminotransferase	http://www.genome.jp/dbget-bin/www_bget?pfn:HZ99_23615
HZ99_RS23115	9564.67	2043	2.227	1.6553e-58	8.916e-57	2-isopropylmalate synthase	http://www.genome.jp/dbget-bin/www_bget?pfn:HZ99_23625
HZ99_RS23160	544.227	221.182	1.299	4.8017e-16	4.4637e-15	DoxX family protein	http://www.genome.jp/dbget-bin/www_bget?pfn:HZ99_23670
HZ99_RS23175	204.491	40.2098	2.3464	6.2484e-26	1.1219e-24	hypothetical protein	http://www.genome.jp/dbget-bin/www_bget?pfn:HZ99_23690
HZ99_RS23350	1790.41	842.696	1.0872	1.8226e-11	1.1213e-10	threonine synthase	http://www.genome.jp/dbget-bin/www_bget?pfn:HZ99_23870
HZ99_RS23435	301.535	104.845	1.5241	1.6151e-16	1.5618e-15	hypothetical protein	http://www.genome.jp/dbget-bin/www_bget?pfn:HZ99_23955
HZ99_RS23440	1210.3	559.397	1.1134	9.974e-15	8.3152e-14	membrane protein	http://www.genome.jp/dbget-bin/www_bget?pfn:HZ99_23960
HZ99_RS23475	2214.26	1039.25	1.0913	2.3011e-15	2.0067e-14	phosphoenolpyruvate carboxylase	http://www.genome.jp/dbget-bin/www_bget?pfn:HZ99_23995
HZ99_RS23530	267.643	126.444	1.0818	4.37e-09	2.0381e-08	hypothetical protein	http://www.genome.jp/dbget-bin/www_bget?pfn:HZ99_24050
HZ99_RS23725	7095.54	3497.34	1.0207	4.3281e-14	3.4562e-13	eno; enolase	http://www.genome.jp/dbget-bin/www_bget?pfn:HZ99_24245
HZ99_RS23750	924.39	397.05	1.2192	0.00037336	0.00083827	S-formylglutathione hydrolase	http://www.genome.jp/dbget-bin/www_bget?pfn:HZ99_24270
HZ99_RS23835	188.422	90.114	1.0641	1.1291e-07	4.3623e-07	membrane protein	http://www.genome.jp/dbget-bin/www_bget?pfn:HZ99_24355
HZ99_RS24100	1012.36	454.221	1.1563	4.5724e-15	3.9068e-14	NADH:flavin oxidoreductase	http://www.genome.jp/dbget-bin/www_bget?pfn:HZ99_24625
HZ99_RS24130	952.415	447.728	1.089	1.7366e-13	1.3105e-12	acyl-CoA dehydrogenase	http://www.genome.jp/dbget-bin/www_bget?pfn:HZ99_24655
HZ99_RS24155	126.675	55.0133	1.2033	9.6164e-06	2.7821e-05	hypothetical protein	http://www.genome.jp/dbget-bin/www_bget?pfn:HZ99_24680
HZ99_RS24185	437.295	188.422	1.2146	5.1267e-13	3.7061e-12	hypothetical protein	http://www.genome.jp/dbget-bin/www_bget?pfn:HZ99_24710
HZ99_RS24335	11.6506	3.62531	1.6842	0.017326	0.029038	helicase	http://www.genome.jp/dbget-bin/www_bget?pfn:HZ99_24865
HZ99_RS24490	878.074	392.021	1.1634	1.3454e-14	1.1149e-13	glycine cleavage system protein R	http://www.genome.jp/dbget-bin/www_bget?pfn:HZ99_25020
HZ99_RS24610	734.158	322.89	1.185	6.6296e-14	5.1664e-13	2-nitropropane dioxygenase	http://www.genome.jp/dbget-bin/www_bget?pfn:HZ99_25140
HZ99_RS24695	2963.86	846.763	1.8074	1.4551e-31	3.2764e-30	NADH dehydrogenase	http://www.genome.jp/dbget-bin/www_bget?pfn:HZ99_25235
HZ99_RS24775	1725.84	650.125	1.4085	2.0039e-23	3.0667e-22	von Willebrand factor A	http://www.genome.jp/dbget-bin/www_bget?pfn:HZ99_25315
HZ99_RS24780	3317.74	1043.88	1.6682	2.4459e-33	5.7922e-32	ATPase AAA	http://www.genome.jp/dbget-bin/www_bget?pfn:HZ99_25320
HZ99_RS24790	2137.48	751.753	1.5076	4.9961e-27	9.3681e-26	cysteine synthase	http://www.genome.jp/dbget-bin/www_bget?pfn:HZ99_25330
HZ99_RS24810	1584.94	751.103	1.0773	2.6733e-14	2.1727e-13	isocitrate dehydrogenase	http://www.genome.jp/dbget-bin/www_bget?pfn:HZ99_25350
HZ99_RS24860	192.947	92.8795	1.0548	5.2186e-08	2.1285e-07	3-oxoadipate enol-lactonase	http://www.genome.jp/dbget-bin/www_bget?pfn:HZ99_25400
HZ99_RS24865	532.071	265.78	1.0014	3.8092e-10	1.9912e-09	LysR family transcriptional regulator	http://www.genome.jp/dbget-bin/www_bget?pfn:HZ99_25405
HZ99_RS25000	840.385	358.31	1.2298	4.266e-16	3.986e-15	nucleoprotein/polynucleotide-associated enzyme	http://www.genome.jp/dbget-bin/www_bget?pfn:HZ99_25550
HZ99_RS25005	1528.68	202.683	2.915	3.9441e-77	3.6115e-75	hypothetical protein	http://www.genome.jp/dbget-bin/www_bget?pfn:HZ99_25555
HZ99_RS25045	874.386	306.264	1.5135	2.3728e-23	3.6111e-22	hydrolase Nlp/P60	http://www.genome.jp/dbget-bin/www_bget?pfn:HZ99_25595
HZ99_RS25105	681.782	243.793	1.4837	2.2694e-21	3.0634e-20	MarR family transcriptional regulator	http://www.genome.jp/dbget-bin/www_bget?pfn:HZ99_25655
HZ99_RS25640	620.153	308.003	1.0097	2.2075e-06	7.0348e-06	membrane protein	http://www.genome.jp/dbget-bin/www_bget?pfn:HZ99_26195
HZ99_RS25650	11629.4	5460.78	1.0906	2.7378e-16	2.5933e-15	gltA; type II citrate synthase	http://www.genome.jp/dbget-bin/www_bget?pfn:HZ99_26205
HZ99_RS25685	4473.27	2228.57	1.0052	4.8847e-13	3.5405e-12	dihydrolipoamide succinyltransferase	http://www.genome.jp/dbget-bin/www_bget?pfn:HZ99_26235
HZ99_RS25690	9098.37	4412.77	1.0439	3.4137e-08	1.423e-07	dihydrolipoamide dehydrogenase	http://www.genome.jp/dbget-bin/www_bget?pfn:HZ99_26240
HZ99_RS25695	7397.7	2665.09	1.4729	1.3403e-06	4.4042e-06	sucC; succinyl-CoA synthetase subunit beta	http://www.genome.jp/dbget-bin/www_bget?pfn:HZ99_26245
HZ99_RS25700	4462.35	1703.05	1.3897	7.5417e-12	4.8689e-11	succinyl-CoA synthetase subunit alpha	http://www.genome.jp/dbget-bin/www_bget?pfn:HZ99_26250
HZ99_RS25800	390.893	183.813	1.0885	2.0746e-10	1.1252e-09	lipase	http://www.genome.jp/dbget-bin/www_bget?pfn:HZ99_26350
HZ99_RS25805	569.346	284.48	1.001	2.4145e-10	1.2942e-09	phosphohistidine phosphatase	http://www.genome.jp/dbget-bin/www_bget?pfn:HZ99_26355
HZ99_RS25810	790.19	381.111	1.052	1.3789e-05	3.889e-05	AMP-binding protein	http://www.genome.jp/dbget-bin/www_bget?pfn:HZ99_26360
HZ99_RS25915	44.8183	18.2288	1.2979	0.00031723	0.00072125	hypothetical protein	http://www.genome.jp/dbget-bin/www_bget?pfn:HZ99_26465
HZ99_RS26030	1691.43	725.055	1.2221	1.3017e-18	1.4685e-17	molecular chaperone	http://www.genome.jp/dbget-bin/www_bget?pfn:HZ99_26585
HZ99_RS26040	1924.97	653.026	1.5596	7.0799e-17	7.0593e-16	recombinase RdgC	http://www.genome.jp/dbget-bin/www_bget?pfn:HZ99_26595
HZ99_RS26065	332.719	56.4884	2.5583	1.0762e-21	1.4931e-20	RNA polymerase sigma factor	http://www.genome.jp/dbget-bin/www_bget?pfn:HZ99_26620
HZ99_RS26080	536.783	162.033	1.728	1.6651e-25	2.9135e-24	catalase	http://www.genome.jp/dbget-bin/www_bget?pfn:HZ99_26635
HZ99_RS26085	999.302	463.824	1.1073	3.3567e-14	2.7001e-13	hypothetical protein	http://www.genome.jp/dbget-bin/www_bget?pfn:HZ99_26640
HZ99_RS26205	413.201	111.726	1.8869	5.6613e-08	2.2988e-07	membrane protein	http://www.genome.jp/dbget-bin/www_bget?pfn:HZ99_26765
HZ99_RS26220	191.171	60.1231	1.6689	3.7049e-15	3.2004e-14	ureidoglycolate hydrolase	http://www.genome.jp/dbget-bin/www_bget?pfn:HZ99_26780
HZ99_RS26225	451.821	189.946	1.2502	6.1379e-14	4.7969e-13	allantoicase	http://www.genome.jp/dbget-bin/www_bget?pfn:HZ99_26785
HZ99_RS26230	100.4	46.97	1.0959	7.1002e-06	2.0905e-05	OHCU decarboxylase	http://www.genome.jp/dbget-bin/www_bget?pfn:HZ99_26790
HZ99_RS26235	355.658	153.831	1.2092	5.666e-12	3.7058e-11	allantoinase	http://www.genome.jp/dbget-bin/www_bget?pfn:HZ99_26795
HZ99_RS26345	833.638	385.488	1.1127	6.874e-14	5.3493e-13	ankyrin	http://www.genome.jp/dbget-bin/www_bget?pfn:HZ99_26910
HZ99_RS26435	2257.75	1035.92	1.124	6.0543e-16	5.5622e-15	hypothetical protein	http://www.genome.jp/dbget-bin/www_bget?pfn:HZ99_27000
HZ99_RS26785	2042.83	955.177	1.0967	4.9708e-15	4.2406e-14	phospho-2-dehydro-3-deoxyheptonate aldolase	http://www.genome.jp/dbget-bin/www_bget?pfn:HZ99_27360
HZ99_RS26830	5537.01	2547.39	1.1201	1.3342e-10	7.3965e-10	elongation factor P	http://www.genome.jp/dbget-bin/www_bget?pfn:HZ99_27405
HZ99_RS26835	210.918	68.7206	1.6179	6.9316e-14	5.3864e-13	organic hydroperoxide resistance protein	http://www.genome.jp/dbget-bin/www_bget?pfn:HZ99_27410
HZ99_RS26855	314.05	145.605	1.1089	2.1923e-10	1.1836e-09	LysR family transcriptional regulator	http://www.genome.jp/dbget-bin/www_bget?pfn:HZ99_27430
HZ99_RS26930	456.666	205.652	1.1509	2.5841e-12	1.7484e-11	ATPase AAA	http://www.genome.jp/dbget-bin/www_bget?pfn:HZ99_27505
HZ99_RS27040	997.256	134.177	2.8938	9.1847e-34	2.2427e-32	hypothetical protein	http://www.genome.jp/dbget-bin/www_bget?pfn:HZ99_27615
HZ99_RS27055	3033.03	1426.35	1.0884	7.7604e-16	7.0941e-15	hypothetical protein	http://www.genome.jp/dbget-bin/www_bget?pfn:HZ99_27630
HZ99_RS27090	1249.55	370.733	1.753	2.9911e-07	1.0797e-06	terpene utilization protein AtuA	http://www.genome.jp/dbget-bin/www_bget?pfn:HZ99_27665
HZ99_RS27500	1215.32	383.177	1.6653	3.7633e-12	2.5092e-11	--	--
HZ99_RS27515	888.002	382.483	1.2152	2.0005e-10	1.0871e-09	--	--
HZ99_RS27605	81.0532	29.6594	1.4504	1.1832e-07	4.5586e-07	transposase	http://www.genome.jp/dbget-bin/www_bget?pfn:HZ99_17630
HZ99_RS27875	63.2589	24.835	1.3489	1.5964e-05	4.4475e-05	hypothetical protein	http://www.genome.jp/dbget-bin/www_bget?pfn:HZ99_15825
HZ99_RS27910	914.562	342.274	1.4179	2.739e-13	2.028e-12	copper resistance protein CopC	http://www.genome.jp/dbget-bin/www_bget?pfn:HZ99_17550
HZ99_RS27935	562.68	257.475	1.1279	2.4352e-12	1.6517e-11	hypothetical protein	http://www.genome.jp/dbget-bin/www_bget?pfn:HZ99_17705
HZ99_RS28140	106.54	40.3139	1.402	2.2487e-08	9.5253e-08	--	--
